# Supplementary material for: Laparoscopic Roux-en-Y gastric bypass in adolescents with severe obesity: a prospective five-year Swedish nationwide study (AMOS)
Source: PubMed Central journal article supplement — Lancet Diabetes Endocrinol. Author manuscript; Available in PMC 2018 Mar 1. (PMC5359414; doi:10.1016/s2213-8587(16)30424-7), 2017-01-06
Supplement: NIHMS842457-supplement-supplement_1.pdf [file NIHMS842457-supplement-supplement_1.pdf]

## Web additional material

**Table S1. Panel A: Additional anthropometric and biochemical data at baseline and 5 years. Panel B: Additional prevalence and remission data for CV risk factors at baseline and 5 years.**

Per protocol data (crossovers excluded). See below, for definitions and thresholds used. RYGB, Roux-en-Y gastric bypass; SD, standard deviation; n, number of patients; CI, confidence interval; Apo A1, apolipoprotein A1; Apo B, apolipoprotein B; WCC, white cell count; ALP, alkaline phosphatase; Vitamin D, 25-hydroxyvitamin D; nd, not determined; nc, not calculable.

| Panel A                      | RYGB adolescents |    |               |    |                                                    |                 |         | Control adolescents |    | RYGB vs. Control adolescents         |                 |         |
|------------------------------|------------------|----|---------------|----|----------------------------------------------------|-----------------|---------|---------------------|----|--------------------------------------|-----------------|---------|
|                              | Raw data         |    |               |    | Within group (RYGB Adolescents) mixed-model change |                 |         | Raw data            |    | Between group mixed-model difference |                 |         |
|                              | Baseline         |    | 5 years       |    | Baseline to 5 years                                |                 |         | 5 years             |    | 5 years                              |                 |         |
| Variable                     | Mean (SD)        | n  | Mean          | n  | Mean change                                        | 95% CI          | P-value | Mean (SD)           | n  | Mean difference                      | 95% CI          | p-value |
| Apo A1 (g/L)                 | 1.2 (0.2)        | 80 | 1.6 (0.3)     | 76 | 0.4                                                | 0.3 to 0.5      | <0.001  | 1.2 (0.2)           | 38 | 0.34                                 | 0.2 to 0.4      | <0.001  |
| Apo B (g/L)                  | 0.9 (0.2)        | 80 | 0.7 (0.2)     | 76 | -0.15                                              | -0.2 to 0.1     | <0.001  | 1.0 (0.2)           | 38 | -0.24                                | -0.3 to -0.2    | <0.001  |
| WCC (x10 <sup>9</sup> /L)    | 8.2 (1.7)        | 77 | 5.8 (1.2)     | 31 | -2.25                                              | -2.8 to -1.7    | <0.001  | 8.4 (1.9)           | 20 | -2.57                                | -3.5 to -1.6    | <0.001  |
| Bilirubin (µmol/L)           | 9.6 (5.3)        | 75 | 7.1 (4.0)     | 76 | -2.4                                               | -3.4 to -1.3    | <0.001  | 7.9 (4.3)           | 40 | -0.8                                 | -2.4 to 0.8     | 0.331   |
| Albumin (g/L)                | 40.1 (3.8)       | 78 | 39.0 (3.7)    | 72 | -1.1                                               | -2.1 to -0.2    | 0.019   | 39.2 (4.5)          | 38 | -0.3                                 | -1.9 to 1.4     | 0.767   |
| ALP (µkat/L)                 | 1.7 (0.6)        | 80 | 1.2 (0.3)     | 75 | -0.5                                               | -0.6 to -0.4    | <0.001  | 1.2 (0.3)           | 38 | 0.0                                  | -0.1 to 0.2     | 0.470   |
| Sodium (mmol/L)              | 140.6 (2.4)      | 78 | 140.6 (2.1)   | 74 | 0.11                                               | -0.6 to 0.8     | 0.748   | 139.8 (2.7)         | 42 | 0.82                                 | -0.1 to 1.8     | 0.093   |
| Potassium (mmol/L)           | 4.1 (0.3)        | 77 | 3.9 (0.3)     | 75 | -0.12                                              | -0.2 to 0.0     | 0.003   | 4.1 (0.3)           | 41 | -0.18                                | -0.3 to -0.1    | 0.005   |
| Creatinine (µmol/L)          | 61.5 (9.3)       | 80 | 61.9 (9.2)    | 72 | 0.35                                               | -1.9 to 2.6     | 0.775   | 62.0 (11.5)         | 40 | -0.03                                | -4.2 to 4.2     | 0.988   |
| Iron (µmol/L)                | 13.1 (5.2)       | 77 | 15.0 (9.1)    | 76 | 1.86                                               | -0.5 to 4.2     | 0.118   | 14.1 (6.2)          | 38 | 0.91                                 | -2.0 to 3.8     | 0.533   |
| Ferritin (pmol/L)            | 135.8 (90.4)     | 65 | 54.8 (59.3)   | 75 | -72.84                                             | -101.7 to -44.0 | <0.001  | 210.4 (170.8)       | 31 | -155.61                              | -217.5 to -93.7 | <0.001  |
| Vitamin B12 (pmol/L)         | 315.2 (95.9)     | 74 | 323.8 (238.6) | 74 | 15.17                                              | -45.9 to 76.2   | 0.628   | 304.8 (112.4)       | 31 | 18.96                                | -49.0 to 87.0   | 0.582   |
| Vitamin D (nmol/L)           | 52.0 (19.0)      | 33 | 43.5 (20.6)   | 73 | -8.62                                              | -16.0 to -1.2   | 0.022   | 49.4 (22.4)         | 35 | -5.87                                | -14.7 to 3.0    | 0.192   |
| Calcium (mmol/L)             | 2.3 (0.1)        | 78 | 2.3 (0.1)     | 72 | -0.04                                              | -0.1 to 0.0     | <0.001  | 2.3 (0.1)           | 39 | -0.05                                | -0.1 to 0.0     | 0.011   |
| Parathyroid hormone (pmol/L) | nd               | 0  | 7.2 (3.6)     | 75 | nc                                                 | nc              | nc      | 5.2 (2.0)           | 37 | 2.01                                 | 1.0 to 3.1      | <0.001  |

**Table S2. Additional prevalence and remission data for CV risk factors at baseline and 5 years.**

Per protocol data (crossovers excluded). See below, for definitions and thresholds used. RYGB, Roux-en-Y gastric bypass; n, number of patients; CI, confidence interval; WCC, white cell count; ALP, alkaline phosphatase; Vitamin D, 25-hydroxyvitamin D; nc, not calculable; \*number in resolution calculation lower than number positively identified at baseline owing to missing data.

| Panel B                 | RYGB adolescents |                     |         |                     |            |                      | p-value<br>RYGB<br>Baseline<br>vs. 5<br>years | Control adolescents |                     | p-value<br>RYGB 5<br>years vs.<br>Controls<br>5 years |
|-------------------------|------------------|---------------------|---------|---------------------|------------|----------------------|-----------------------------------------------|---------------------|---------------------|-------------------------------------------------------|
|                         | Baseline         |                     | 5 years |                     | Resolution |                      |                                               | 5 years             |                     |                                                       |
|                         | n                | % (95% CI)          | n       | % (95% CI)          | n          | % (95% CI)           |                                               | n                   | % (95% CI)          |                                                       |
| Elevated WCC            | 7/77             | 9.1 (3.7 to 17.8)   | 0/31    | 0.0 (0.0 to 11.2)   | 1/1*       | 100.0 (2.5 to 100.0) | 1.000                                         | 4/20                | 20.0 (5.7 to 43.7)  | 0.019                                                 |
| Low Albumin             | 2/78             | 2.6 (0.3 to 9.0)    | 9/72    | 12.5 (5.9 to 22.4)  | 1/1*       | 100.0 (2.5 to 100.0) | 0.021                                         | 4/38                | 10.5 (2.9 to 24.8)  | 1.000                                                 |
| Elevated ALP            | 0/80             | 0.0 (0.0 to 4.5)    | 0/75    | 0.0 (0.0 to 4.8)    | nc         | nc                   | nc                                            | 0/38                | 0.0 (0.0 to 9.3)    | nc                                                    |
| Elevated creatinine     | 1/80             | 1.3 (0.0 to 6.8)    | 0/72    | 0.0 (0.0 to 5.0)    | 1/1        | 100.0 (2.5 to 100.0) | 1.000                                         | 0/40                | 0.0 (0.0 to 8.8)    | nc                                                    |
| Vitamin D insufficiency | 16/33            | 48.5 (30.8 to 66.5) | 46/73   | 63.0 (50.9 to 74.0) | 4/16       | 25.0 (7.3 to 52.4)   | 0.267                                         | 20/35               | 57.1 (39.4 to 73.7) | 0.674                                                 |
| Vitamin D deficiency    | 4/33             | 12.1 (3.4 to 28.2)  | 20/73   | 27.4 (17.6 to 39.1) | 2/4        | 50.0 (6.8 to 93.2)   | 0.065                                         | 7/35                | 20.0 (8.4 to 36.9)  | 0.482                                                 |
| Low Vitamin B12         | 1/74             | 1.4 (0.0 to 7.3)    | 16/73   | 21.9 (13.1 to 33.1) | 0/1        | 0.0 (0.0 to 97.5)    | <0.001                                        | 2/31                | 6.5 (0.8 to 21.4)   | 0.051                                                 |
| Low ferritin            | 5/65             | 7.7 (2.5 to 17.0)   | 50/75   | 66.7 (54.6 to 77.1) | 2/4*       | 50.0 (6.8 to 93.2)   | <0.001                                        | 3/31                | 9.7 (2.0 to 25.8)   | <0.001                                                |
| Low iron                | 15/76            | 19.7 (11.5 to 30.5) | 22/76   | 28.9 (19.1 to 40.5) | 7/12*      | 58.3 (27.7 to 84.8)  | 0.093                                         | 10/38               | 26.3 (13.4 to 43.1) | 0.828                                                 |

**Table S3. Details of quality of life outcomes from SF-36 questionnaire.**

Panel A shows data from SF-36 (short-form 36 questionnaire) scores. Asterisks indicate significant improvement between baseline and 5 years among RYGB adolescents. Panel B shows data from SF-36 Physical and Mental Component Scores and OP-14 (obesity-related problem scale) scores. A higher score in SF-36 domains indicates better function, whereas a higher OP-14 score indicates greater dysfunction. Both panels show data at baseline and 5 years after Roux-en-Y gastric bypass (RYGB) and panel A also shows data from control patients at 5 years following conservative management (CON) for adolescent severe obesity.

| Variable                            | RYGB adolescents |                    |             |               |         | Control adolescents | RYGB vs. CON, 5 years |              |         |
|-------------------------------------|------------------|--------------------|-------------|---------------|---------|---------------------|-----------------------|--------------|---------|
|                                     | BL, mean (SD)    | 5 years, mean (SD) | Mean change | 95% CI        | p-value | 5 years, mean (SD)  | Mean difference       | 95% CI       | p-value |
| <i>Generic QoL (SF-36)</i>          |                  |                    |             |               |         |                     |                       |              |         |
| <b>Physical functioning</b>         | 72.1 (22.4)      | 84.4 (21.2)        | 13.5        | 8.1 to 19.0   | <0.001  | 75.9 (23.4)         | 8.8                   | -0.0 to 17.6 | 0.051   |
| <b>Physical role functioning</b>    | 75.9 (24.6)      | 83.9 (25.2)        | 11.2        | 4.0 to 18.3   | 0.002   | 71.3 (30.9)         | 13.5                  | 2.2 to 24.8  | 0.020   |
| <b>General health perceptions</b>   | 53.8 (23.4)      | 64.8 (22.7)        | 12.4        | 6.5 to 18.3   | <0.001  | 56.2 (26.6)         | 8.7                   | -1.1 to 18.5 | 0.080   |
| <b>Bodily pain</b>                  | 67.7 (26.8)      | 67.6 (30.0)        | 2.1         | -5.2 to 9.3   | 0.575   | 71.6 (27.5)         | -3.1                  | -14.0 to 7.9 | 0.579   |
| <b>Vitality</b>                     | 48.4 (18.6)      | 50.8 (23.0)        | 3.8         | -2.2 to 9.9   | 0.211   | 54.8 (27.2)         | -3.5                  | -13.6 to 6.6 | 0.497   |
| <b>Mental health</b>                | 65.6 (21.0)      | 68.1 (21.8)        | 4.1         | -1.7 to 9.9   | 0.166   | 63.5 (27.0)         | 5.1                   | -4.7 to 15.0 | 0.305   |
| <b>Social role functioning</b>      | 77.1 (25.7)      | 79.5 (26.1)        | 3.3         | -2.7 to 9.4   | 0.285   | 72.8 (29.8)         | 7.5                   | -3.5 to 18.6 | 0.180   |
| <b>Emotional role functioning</b>   | 75.2 (30.7)      | 80.7 (27.5)        | 6.3         | -1.2 to 13.8  | 0.099   | 73.1 (33.4)         | 8.3                   | -3.9 to 20.6 | 0.180   |
| <b>Physical component score</b>     | 44.1 (9.5)       | 48.3 (10.3)        | 5.2         | 2.5 to 7.9    | <0.001  | 45.7 (10.0)         | -2.9                  | -6.9 to 1.0  | 0.137   |
| <b>Mental component score</b>       | 41.6 (12.2)      | 44.7 (12.1)        | 0.7         | -2.5 to 3.9   | 0.658   | 42.9 (15.4)         | -2.3                  | -7.9 to 3.4  | 0.427   |
| <i>Obesity-specific QoL (OP-14)</i> |                  |                    |             |               |         |                     |                       |              |         |
| <b>OP-14 scale score</b>            | 49.1 (26.4)      | 37.4 (28.8)        | -13.0       | -19.6 to -6.4 | <0.001  | 45.1 (34.9)         | -7.9                  | -20.7 to 4.5 | 0.218   |

**Figure S1. Patient flow chart.**

RYGB, Roux-en-Y gastric bypass (RYGB); \*One patient decided against surgical treatment on the day of surgery.

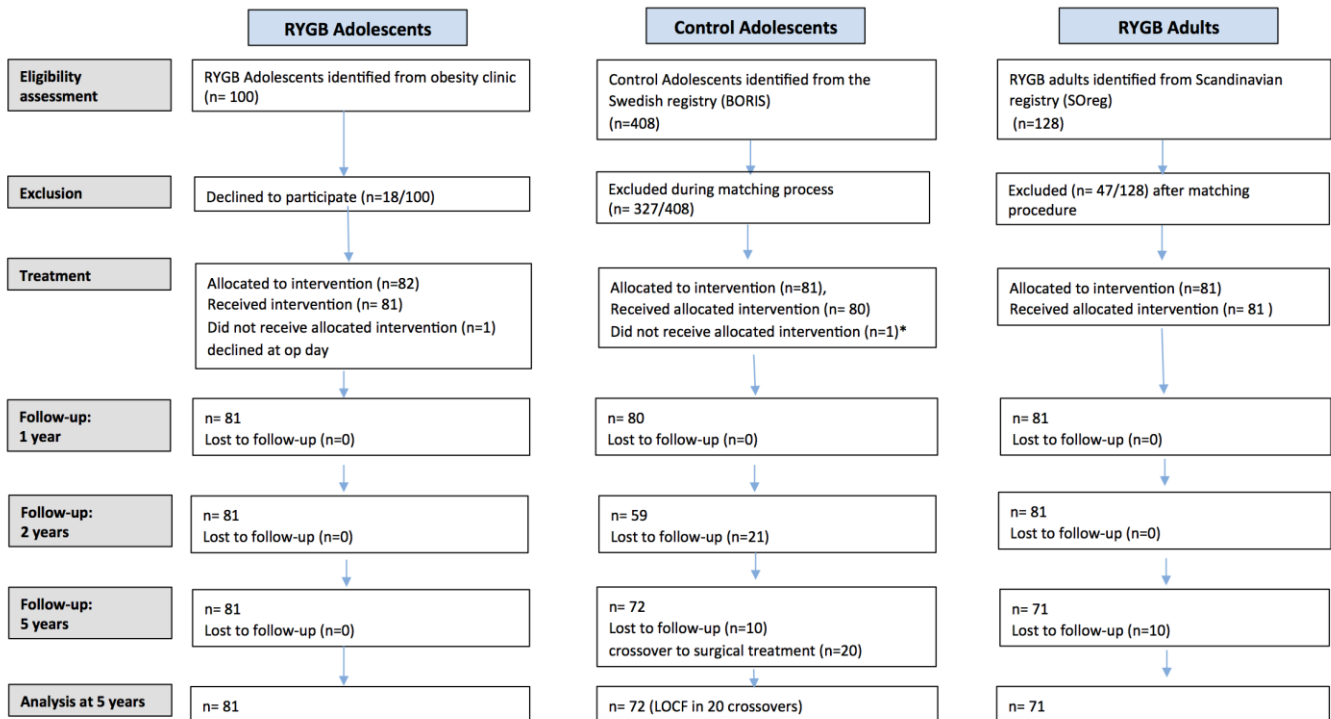

**Figure S2 – Biochemical and blood pressure data curves from baseline to 5 years.**

Means within the adolescent RYGB group are presented as point markers with 95% confidence bars. HbA1c, glycated haemoglobin; hsCRP, high-sensitivity C-reactive protein; HDL, high-density lipoprotein; LDL, low-density lipoprotein; syst, systolic; diast, diastolic.

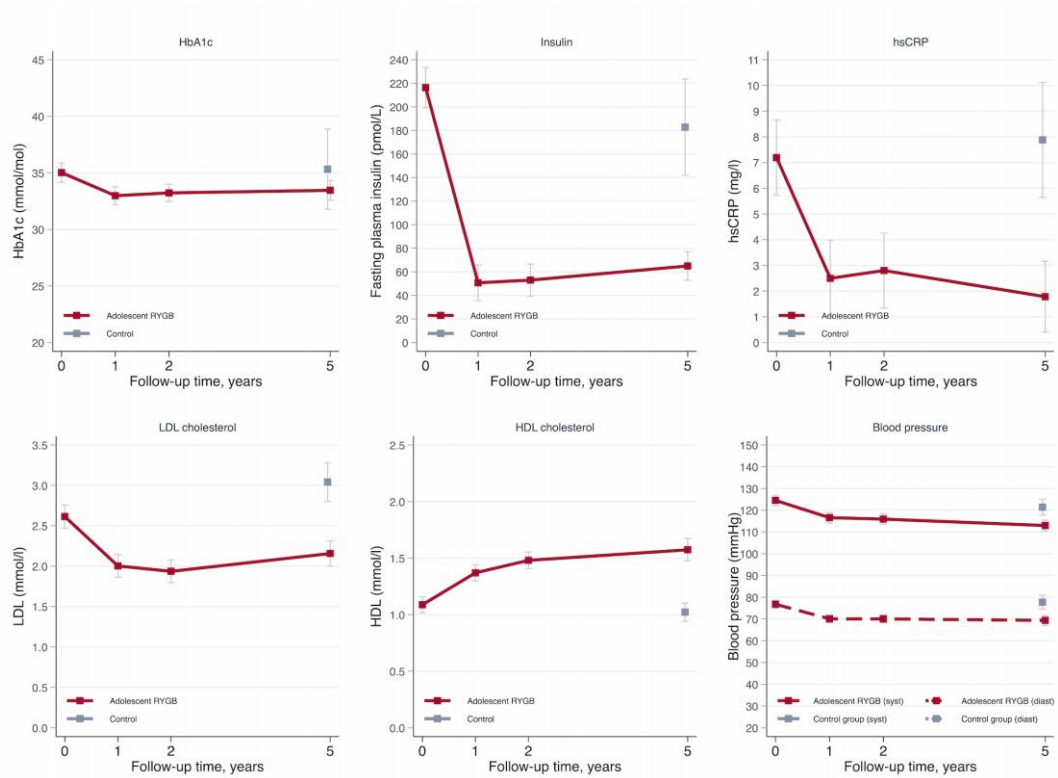

**Figure S3 – Body height from baseline to 5 years for adolescents with severe obesity undergoing Roux-en-Y gastric bypass or conservative treatment.**

Means are presented as point markers with 95% confidence bars.

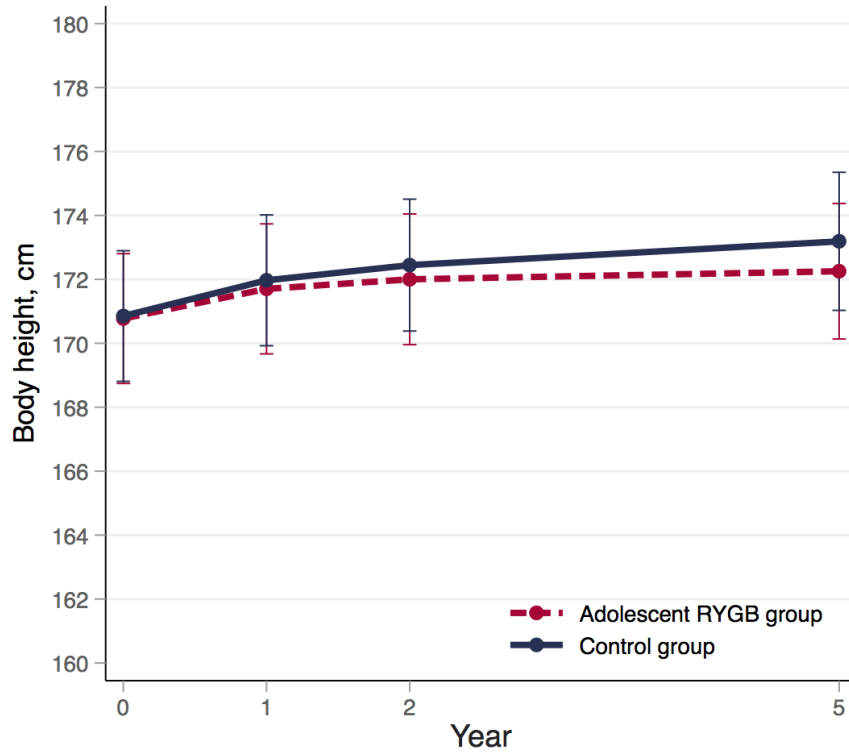

### Definitions and thresholds:

**Type 2 diabetes mellitus (T2DM)** was defined in accordance with ADA criteria,<sup>1</sup> i.e. fasting blood glucose (FBG) of  $\geq 7$  mmol/L ( $\geq 126$  mg/dL), HbA1c of  $\geq 45$  mmol/mol ( $\geq 6.5\%$ ), or the existence of a prior medical record of T2DM.

Remission of T2DM was defined in accordance with ADA criteria,<sup>2</sup> i.e., FBG  $< 7.0$  mmol/L ( $< 126$  mg/dL), HbA1C  $< 45$  mmol/mol ( $< 6.5\%$ ), fasting capillary glucose  $< 6.1$  mmol/L ( $< 110$  mg/dL) in combination with the absence of diabetes medication.

**Disturbed glucose homeostasis** was defined in accordance with ADA criteria,<sup>1</sup> i.e. FBG  $\geq 5.5$  mmol/L but  $< 7$  mmol/L ( $\geq 100$  mg/dL but  $< 126$  mg/dL), HbA1c of  $\geq 39$  mmol/mol ( $\geq 5.7\%$ ) but  $< 45$  mmol/mol ( $< 6.5\%$ ), fasting capillary glucose  $\geq 6.1$  mmol/L but  $< 7.0$  mmol/L ( $\geq 100$  but  $< 110$  mg/dL), in the absence of medication use for T2DM.

Remission of disturbed glucose homeostasis was defined in accordance with ADA criteria,<sup>2</sup> i.e., FBG  $< 5.5$  mmol/L ( $< 100$  mg/dL), HbA1c  $< 39$  mmol/mol ( $< 5.7\%$ ), fasting capillary glucose  $< 5.5$  mmol/L ( $< 100$  mg/dL) in the absence of medication use for T2DM.

**Dyslipidaemia** was defined as use of lipid lowering medications (LLM), or fasting triglycerides (TG)  $\geq 1.47$  mmol/L ( $\geq 130$  mg/dL), or low density lipoprotein cholesterol (LDL-C)  $\geq 3.37$  mmol/L ( $\geq 130$  mg/dL), or high density lipoprotein cholesterol (HDL-C)  $\geq 1.04$  mmol/L ( $< 40$  mg/dL).

Remission of dyslipidaemia was defined in subjects  $< 21$  years of age as no use of LLM, and fasting TG  $\geq 1.47$  mmol/L ( $< 130$  mg/dL), and LDL-C  $< 3.37$  mmol/L ( $< 130$  mg/dL), and HDL-C  $\geq 1.04$  mmol/L ( $\geq 40$  mg/dL).

In subjects  $\geq 21$  years of age, remission was defined as no use of LLM, and fasting TG  $< 2.26$  mmol/L ( $< 200$  mg/dL), and LDL-C  $< 4.14$  mmol/L ( $< 160$  mg/dL), and HDL-C  $\geq 1.04$  mmol/L ( $\geq 40$  mg/dL) if male or  $\geq 1.29$  mmol/L ( $\geq 50$  mg/dL) if female.

**Elevated blood pressure (BP)** was defined according to cutoffs used to define hypertension. However, in the absence of multiple, separated measurements, and in concordance with existing literature in this field<sup>16</sup>, the term elevated BP was used, rather than hypertension.

Elevated BP was defined in subjects  $< 18$  years of age as use of BP medications, or systolic (SBP) or diastolic BP (DBP)  $\geq 95^{\text{th}}$  percentile for age, sex and height. In subjects  $\geq 18$  years of age, the definition was use of BP medications, or SBP  $\geq 140$  mmHg or DBP  $\geq 90$  mmHg.

Remission of elevated BP was defined as no use of BP medications and SBP  $< 140$  mmHg and DBP  $< 90$  mmHg, since all subjects were  $\geq 18$  years of age.

**Inflammation** was defined as high sensitivity C-reactive protein (hsCRP)  $\geq 2$  mg/L ( $\geq 19$  nmol/L).

Remission of inflammation was defined as hsCRP  $< 2$  mg/L ( $< 19$  nmol/L).

**Anaemia** was defined as haemoglobin  $< 100$  g/L if female, or  $< 110$  g/L, if male. Low haemoglobin was defined as  $< 120$  but  $\geq 100$  g/L if female, or  $< 130$  but  $\geq 110$  g/L if male.

### Additional measures:

| Parameter                       | Abnormality threshold                                     |
|---------------------------------|-----------------------------------------------------------|
| Fasting plasma insulin          | $\geq 139$ pmol/L                                         |
| Vitamin D (25 hydroxyvitamin D) | $< 50$ nmol/L (insufficiency); $< 30$ nmol/L (deficiency) |
| Vitamin B12                     | $< 145$ pmol/L                                            |
| Ferritin                        | $< 45$ pmol/L (boys); $< 22.5$ pmol/L (girls)             |
| Iron                            | $< 9$ $\mu$ mol/L                                         |
| Creatinine                      | $\geq 90$ $\mu$ mol/L                                     |
| Aspartate transaminase          | $\geq 0.7$ $\mu$ kat/L                                    |
| Alanine transaminase            | $\geq 0.7$ $\mu$ kat/L                                    |
| Albumin                         | $< 35$ g/L                                                |
| Alkaline phosphatase            | $\geq 6.5$ $\mu$ kat/L                                    |
| Apo A1                          | $\leq 1.0$ g/L                                            |
| Apo B                           | $> 0.9$ g/L                                               |

### Web additional material references

1. American Diabetes Association. Diagnosis and classification of diabetes mellitus. *Diabetes care* 2012; **35 Suppl 1**: S64-71.
2. Buse JB, Caprio S, Cefalu WT, et al. How do we define cure of diabetes? *Diabetes care*. 2009; **1**;32(11):2133-5.
3. Inge TH, Courcoulas AP, Jenkins TM, et al. Weight Loss and Health Status 3 Years after Bariatric Surgery in Adolescents. *The New England journal of medicine* 2016; **374**(2): 113-23.
